# Supplementary material for: C-reactive protein (CRP) recognizes uric acid crystals and recruits proteases C1 and MASP1
Source: PubMed Central journal article supplement (PMC7156728; doi:10.1038/s41598-020-63318-8), 2020-04-14
Supplement: 41598_2020_63318_MOESM1_ESM.pdf [file 41598_2020_63318_MOESM1_ESM.pdf]

## Supplementary Materials

### **C-reactive protein (CRP) recognizes uric acid crystals and recruits proteases C1 and MASP1**

Anika Alberts<sup>1</sup>, Annika Klingberg<sup>1</sup>, Anne Kathrin Wessig<sup>1</sup>, Christèle Combes<sup>2</sup>, Torsten Witte<sup>3</sup>,  
Korbinian Brand<sup>1</sup>, Andreas Pich<sup>4</sup>, Konstantin Neumann<sup>1\*</sup>

<sup>1</sup>Institute of Clinical Chemistry, Hannover Medical School, 30625 Hannover, Germany

<sup>2</sup>CIRIMAT, Université de Toulouse, CNRS, Toulouse INP - ENSIACET, 31030 Toulouse, France

<sup>3</sup>Department of Immunology and Rheumatology, Hannover Medical School, 30625 Hannover, Germany

<sup>4</sup>Research Core Unit Proteomics & Institute of Toxicology, Hannover Medical School, 30625 Hannover, Germany

### Supplementary Tables & Figures

**Table S1: MS-identified MSU-bound proteins from Figure 3a**

**Figure S1. CRP binds to MSU crystals (related to Figure 1).**

**Figure S2. CRP recruits C1 and MASP1 to the surface of MSU crystals in serum (related to Figure 3b, c)**

### Uncropped images:

Figure S3. Uncropped SDS-PAGE and Western blots from Fig. 1 and Fig. 2e

Figure S4. Uncropped SDS-PAGE and Western blots from Fig. 3a, b

Figure S5. Uncropped Western blots from Fig. 3c, d

Figure S6. Uncropped Western blots from Fig. S2a

Figure S7. Uncropped Western blots from Fig. S2b

**a) LC-MS-identified MSU-bound proteins from Figure 3a**

| Log <sub>2</sub> -intensity |      | CRP / Vehicle | Protein name                     | Gene name | Known contaminant | Verified (WB) |
|-----------------------------|------|---------------|----------------------------------|-----------|-------------------|---------------|
| Vehicle                     | CRP  |               |                                  |           |                   |               |
| 30.5                        | 32.0 | 2.7           | Complement C3                    | C3        |                   | Yes           |
| 20.5                        | 30.9 | 1305.7        | C-reactive protein               | CRP       |                   | Yes           |
| 29.3                        | 30.0 | 1.6           | Fibrinogen alpha chain           | FGA       |                   |               |
| 27.8                        | 29.2 | 2.7           | Fibrinogen beta chain            | FGB       |                   |               |
| 28.3                        | 29.2 | 1.8           | Serum albumin                    | ALB       |                   |               |
| 25.7                        | 28.8 | 8.7           | Keratin, type I cytoskeletal 10  | KRT10     | x                 |               |
| 28.2                        | 28.8 | 1.6           | Apolipoprotein E                 | APOE      |                   |               |
| 28.1                        | 28.8 | 1.5           | Serum amyloid P-component        | APCS      |                   | Yes           |
| 27.7                        | 28.6 | 2.0           | Fibrinogen gamma chain           | FGG       |                   | Yes           |
| 26.1                        | 28.5 | 5.2           | (Pro)thrombin                    | F2        |                   | unchanged     |
| 30.3                        | 28.4 | 0.3           | Apolipoprotein B-100             | APOB      |                   | inconclusive  |
| 28.0                        | 28.3 | 1.3           | Coagulation factor X             | F10       |                   |               |
| 24.1                        | 28.3 | 17.7          | Complement C1qB                  | C1QB      |                   | Yes           |
| 25.5                        | 28.1 | 6.0           | Complement C1qC                  | C1QC      |                   | Yes           |
| 27.4                        | 27.9 | 1.5           | Vitronectin                      | VTN       |                   |               |
| 29.6                        | 27.9 | 0.3           | Fibronectin                      | FN1       |                   |               |
| 27.1                        | 27.8 | 1.6           | Apolipoprotein A-I               | APOA1     |                   |               |
| 26.9                        | 27.7 | 1.7           | Keratin, type II cytoskeletal 1  | KRT1      | x                 |               |
| 21.4                        | 27.5 | 67.9          | Complement C1qA                  | C1QA      |                   | Yes           |
| 27.2                        | 27.4 | 1.1           | Keratin, type I cytoskeletal 9   | KRT9      | x                 |               |
| 26.5                        | 26.7 | 1.1           | Histidine-rich glycoprotein      | HRG       |                   |               |
| 24.5                        | 26.1 | 3.1           | Clusterin                        | CLU       |                   |               |
| 27.8                        | 25.9 | 0.3           | Apolipoprotein(a)                | LPA       |                   |               |
| 24.5                        | 25.7 | 2.4           | Ig kappa chain C region          | IGKC      |                   |               |
| 24.4                        | 25.7 | 2.5           | Vitamin K-dependent protein C    | PROC      |                   |               |
| 21.6                        | 25.7 | 16.7          | Complement C1r                   | C1R       |                   | Yes           |
| 22.7                        | 25.4 | 6.7           | Complement C1s                   | C1S       |                   | Yes           |
| 25.0                        | 25.4 | 1.3           | Vitamin K-dependent protein S    | PROS1     |                   |               |
| 25.2                        | 25.3 | 1.1           | C4b-binding protein alpha chain  | C4BPA     |                   |               |
| 23.4                        | 25.2 | 3.6           | Vitamin K-dependent protein Z    | PROZ      |                   |               |
| 25.8                        | 25.2 | 0.7           | Apolipoprotein A-IV              | APOA4     |                   |               |
| 24.9                        | 25.1 | 1.1           | Complement C5                    | C5        |                   |               |
| 24.8                        | 25.0 | 1.2           | Keratin, type II cytoskeletal 1b | KRT77     | x                 |               |
| 22.9                        | 25.0 | 4.4           | Coagulation factor IX            | F9        |                   |               |
| 25.9                        | 24.9 | 0.5           | Complement C9                    | C9        |                   |               |

**b) Low abundant proteins that show more than 10-fold change**

|      |      |      |                                         |       |  |              |
|------|------|------|-----------------------------------------|-------|--|--------------|
| 20.3 | 23.9 | 12.7 | Coagulation factor VII                  | F7    |  | unchanged    |
| 18.3 | 21.9 | 12.0 | Mannan-binding lectin serine protease 1 | MASP1 |  | Yes          |
| nd   | 15.4 | nd   | Mannose-binding protein C               | MBL2  |  | inconclusive |

**Table S1: MS-identified MSU-bound proteins from Figure 3a**

- a)** List of proteins with the highest intensity identified from lane 4 (in presence of CRP) using MaxQuant. Ratio of the intensity in the presence of CRP (lane 4) to the intensity in the absence of CRP (lane 3) is shown in the 3rd column. Green rows indicate proteins that are increased at least 5-fold, red rows indicate proteins that are decreased at least 3-fold in the presence of CRP. Last lane indicates the results of validation by Western blot analysis.
- b)** List of all remaining proteins with low intensity that show an increase of >10-fold in the presence of CRP (Proteins with a score <30 were excluded).

**a**

| †Family | M | DB            | Accession       | Score | emPAI | Mass  | Cov  | Match(sig) | Seq(uniq+sig) | Description                                                              |
|---------|---|---------------|-----------------|-------|-------|-------|------|------------|---------------|--------------------------------------------------------------------------|
| 2       | 1 | Uniprot_human | af2::P02741     | 4915  | 1.78  | 25194 | 0.28 | 162        | 9             | C-reactive protein OS=Homo sapiens GN=CRP PE=1 SV=1                      |
| 3       | 1 | Uniprot_human | af2::P02647     | 1850  | 5.50  | 30759 | 0.61 | 56         | 18            | Apolipoprotein A-I OS=Homo sapiens GN=APOA1 PE=1 SV=1                    |
| 5       | 1 | Uniprot_human | af2::P04264     | 1036  | 0.55  | 66170 | 0.16 | 26         | 10            | Keratin, type II cytoskeletal 1 OS=Homo sapiens GN=KRT1 PE=1 SV=6        |
| 6       | 1 | Uniprot_human | af2::P02743     | 858   | 1.75  | 25485 | 0.35 | 24         | 9             | Serum amyloid P-component OS=Homo sapiens GN=APCS PE=1 SV=2              |
| 7       | 1 | Uniprot_human | af2::P02747     | 844   | 1.17  | 25985 | 0.25 | 24         | 5             | Complement C1q subcomponent subunit C OS=Homo sapiens GN=C1QC PE=1 SV=3  |
| 8       | 1 | Uniprot_human | af2::P01834     | 800   | 2.22  | 11929 | 0.79 | 22         | 5             | Immunoglobulin kappa constant OS=Homo sapiens GN=IGKC PE=1 SV=2          |
| 10      | 1 | Uniprot_human | af2::P02649     | 494   | 0.49  | 36246 | 0.22 | 7          | 5             | Apolipoprotein E OS=Homo sapiens GN=APOE PE=1 SV=1                       |
| 11      | 1 | Uniprot_human | af2::P01619     | 294   | 0.55  | 12663 | 0.22 | 4          | 2             | Immunoglobulin kappa variable 3-20 OS=Homo sapiens GN=IGKV3-20 PE=1 SV=2 |
| 14      | 1 | Uniprot_human | af2::P0CF74     | 255   | 1.07  | 11441 | 0.46 | 7          | 3             | Immunoglobulin lambda constant 6 OS=Homo sapiens GN=IGLC6 PE=1 SV=1      |
| 15      | 1 | Uniprot_human | af2::A0A0C4DH68 | 234   | 0.89  | 13185 | 0.21 | 9          | 2             | Immunoglobulin kappa variable 2-24 OS=Homo sapiens GN=IGKV2-24 PE=3 SV=1 |
| 16      | 1 | Uniprot_human | af2::O95445     | 223   | 0.70  | 21582 | 0.16 | 12         | 4             | Apolipoprotein M OS=Homo sapiens GN=APOM PE=1 SV=2                       |

**b**

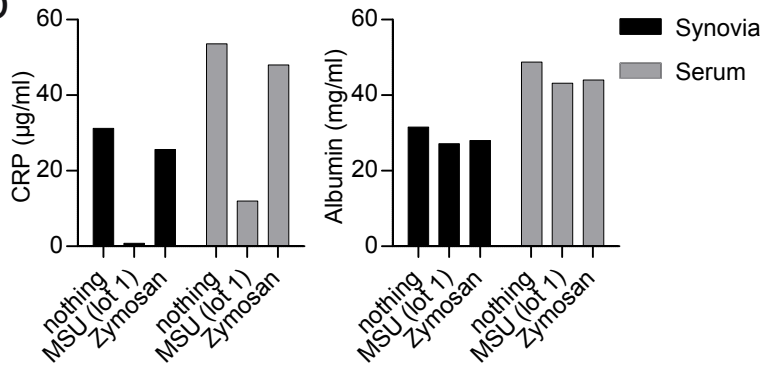

**c**

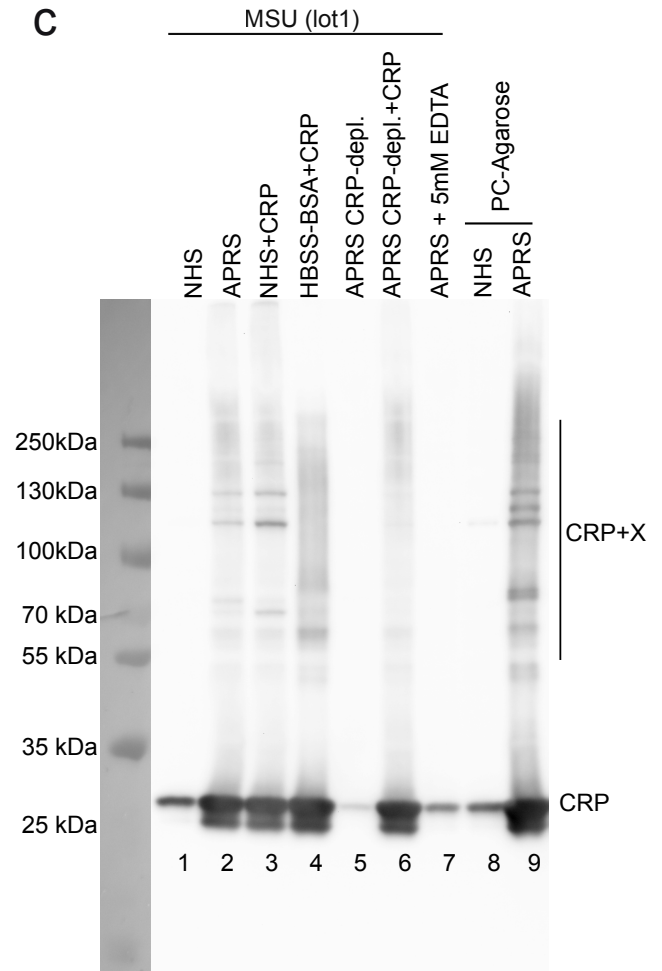

**d**

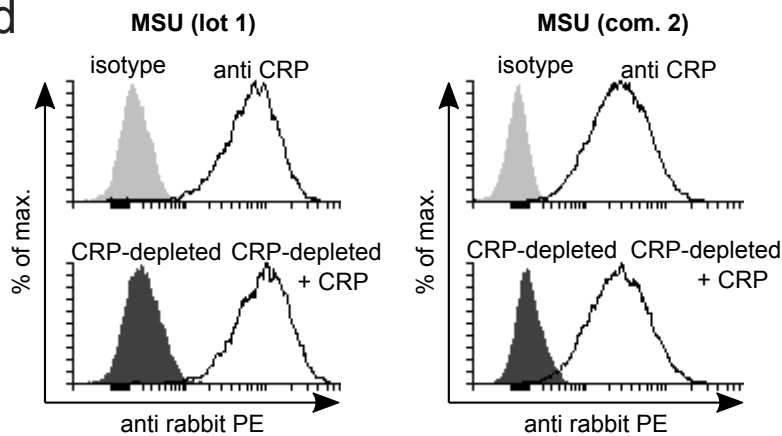

**Figure S1. CRP binds to MSU crystals (related to Figure 1).**

**a)** Proteins identified from 25 kDa band purified from synovial fluid using MSU.

**b)** CRP was quantified from synovial fluid and serum samples from Figure 1a before (nothing) or after incubation with MSU or zymosan.

**c)** Complete anti-CRP Western blot from Figure 1b.

**d)** MSU crystals lot 1 or commercial MSU (com. 2) were stained as in Figure 1c.

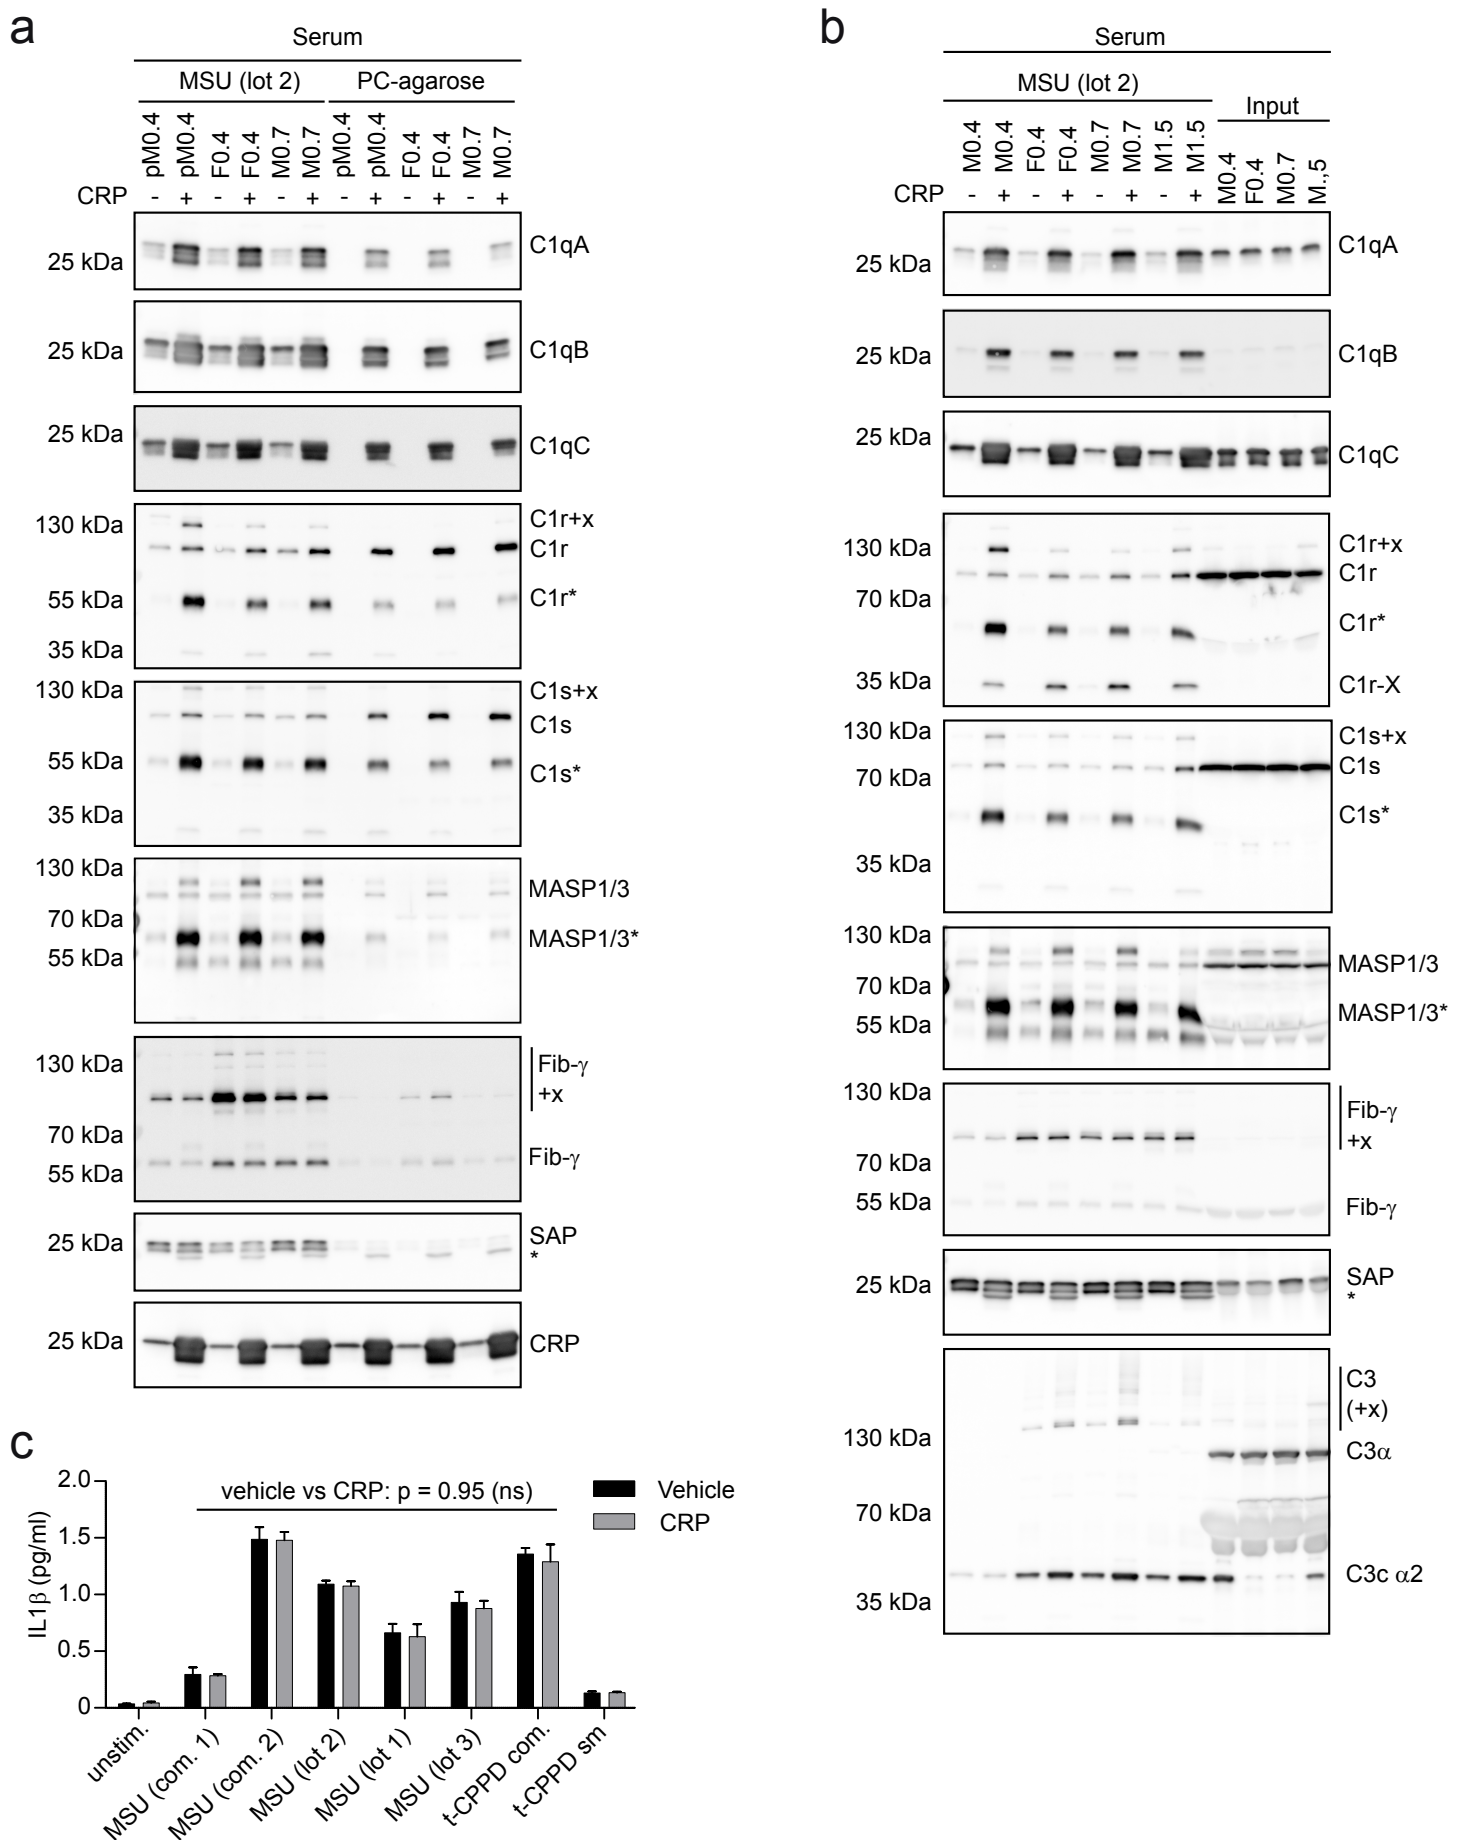

**Figure S2. CRP recruits C1 and MASP1 to the surface of MSU crystals in serum (related to Figure 3bc)**

**a)** Experiment was performed as in Figure 3b, but with serum instead of plasma.

**b)** Experiment was performed with four different sera as in **a**, with the input serum applied to lanes 9 – 12.

**c)** THP-1 cells were primed for 16 h with PMA and then stimulated for 3 h with five distinct preparations of MSU and two preparations of t-CPPD crystals that were opsonized in human serum in the presence or absence of 100  $\mu$ g/ml purified CRP. IL1 $\beta$  was analyzed in the supernatant by ELISA. Triplicates + SD are shown. Paired students t-test was performed on all MSU crystals in the absence vs. in the presence of CRP; representative of two independent experiments

Uncropped gel from Fig. 1b and Fig. 2e

Uncropped gel from Fig. 1a

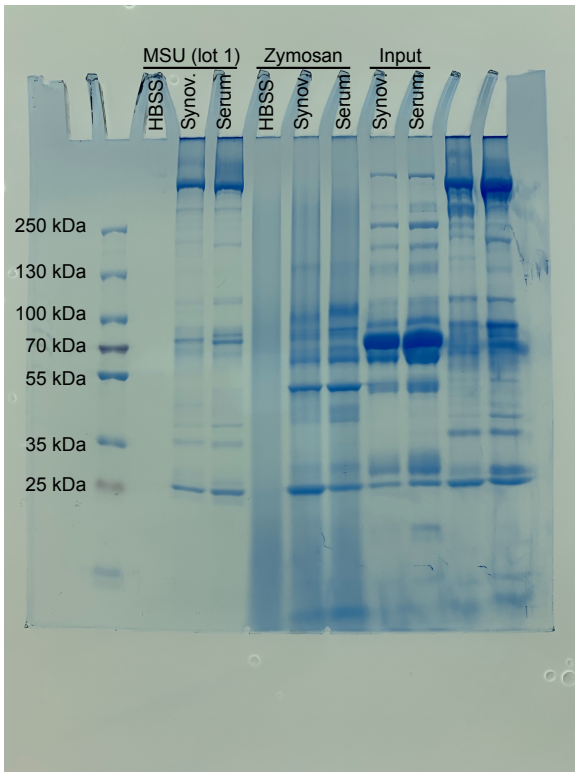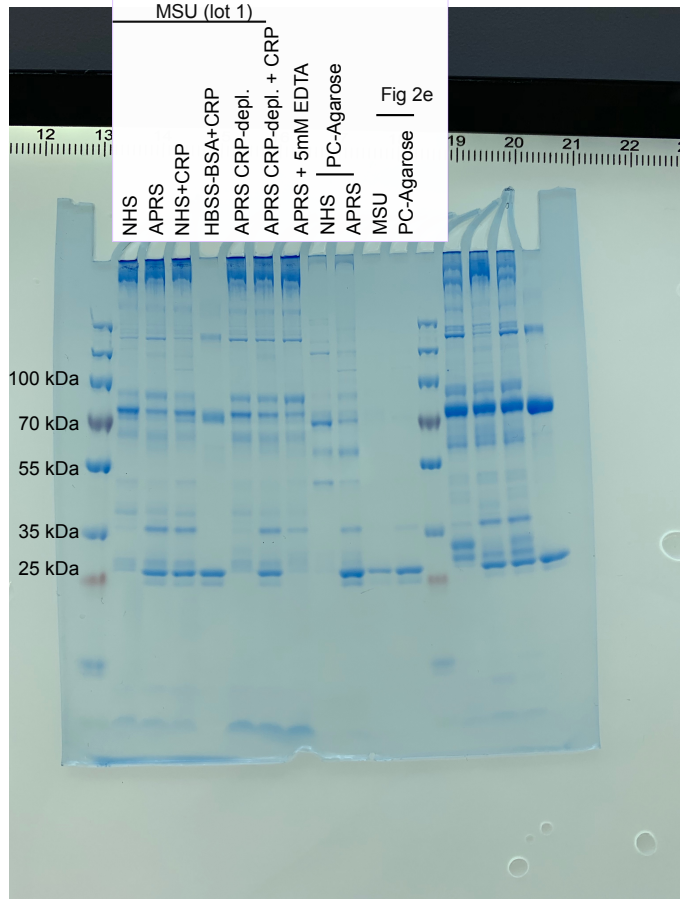

Uncropped Western blot from Fig. 1b middle panel

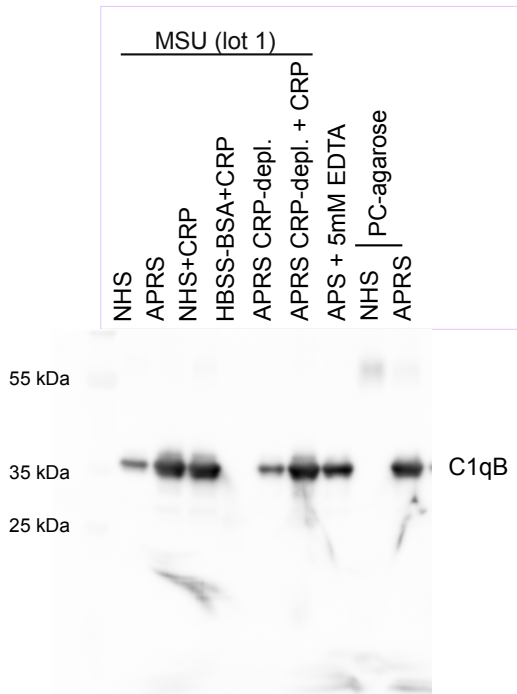

Uncropped Western Bot from Fig. 1b lower panel using anti CRP is shown in Fig. S1c

Figure S3. Uncropped gels and Western Blots from Figure 1 and 2e

Uncropped coomassie-stained SDS-PAGE gel  
from Fig. 3a

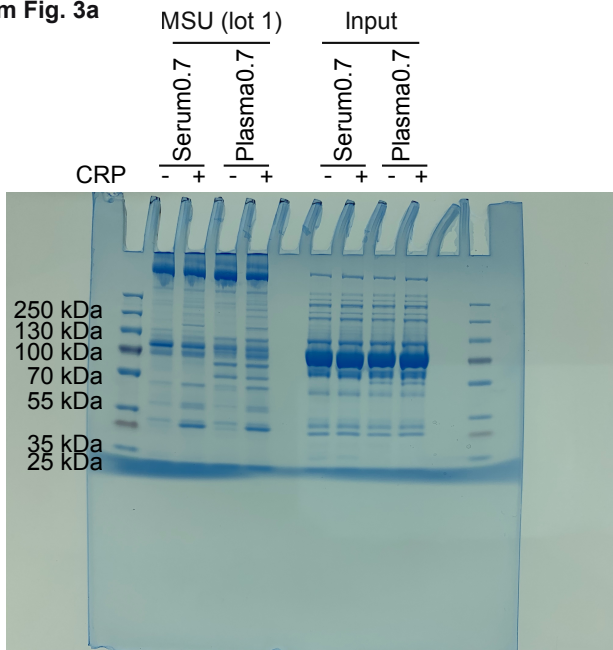

Figure S4. Uncropped gels and Western Blots from Figure 3a, b

Uncropped Western blots from Fig. 3b

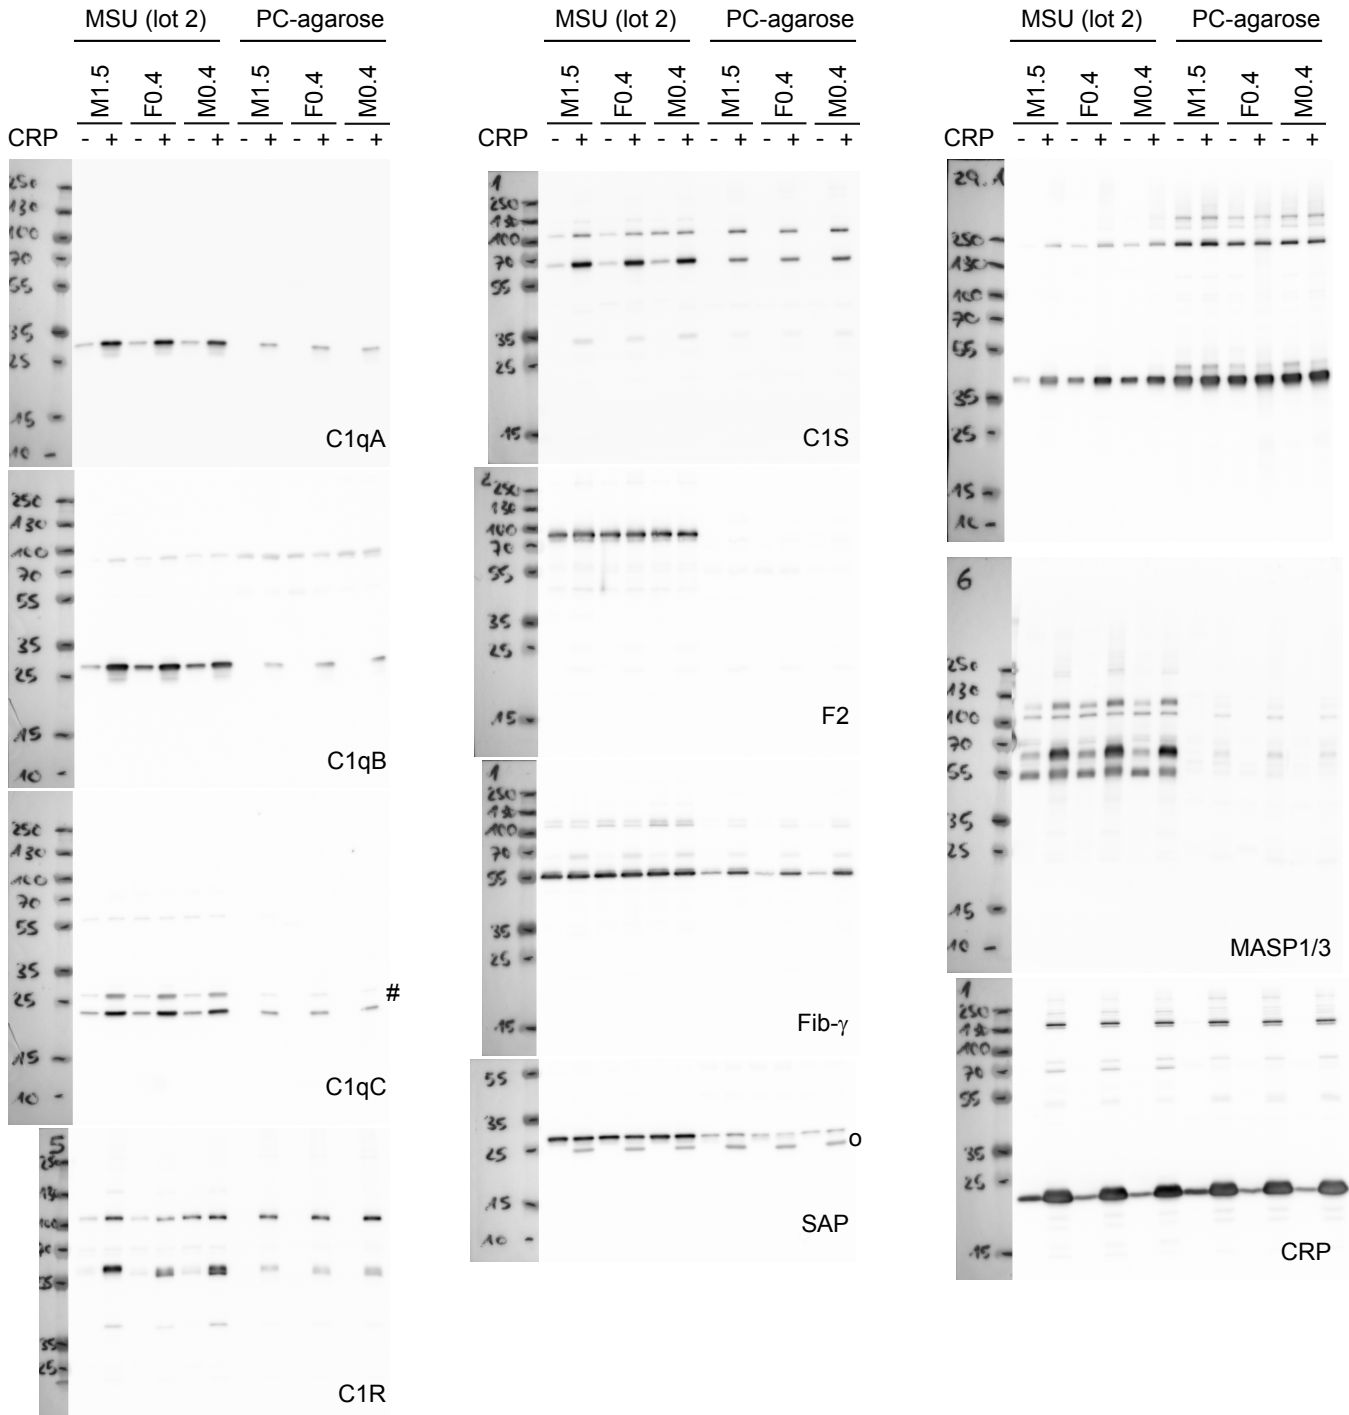

Uncropped images from Fig. 3c

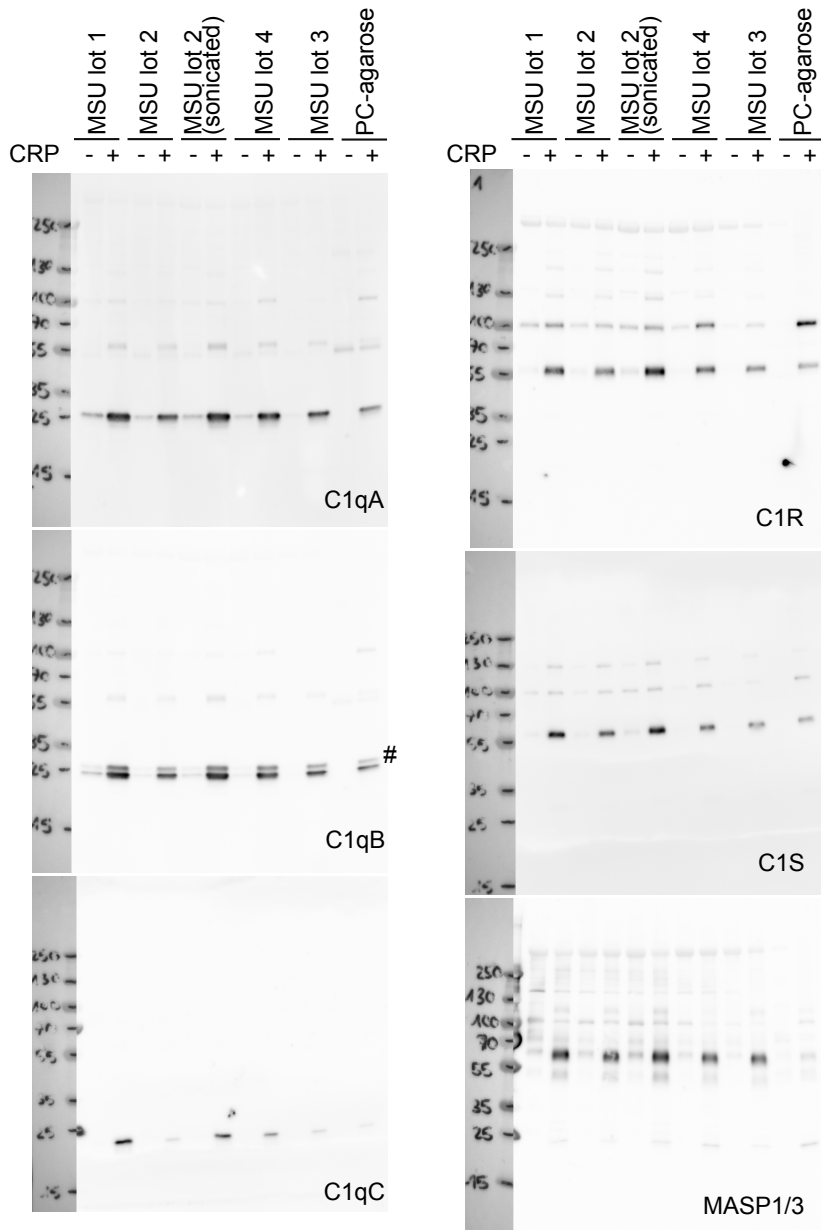

Western blot used for quantification of C3 binding in Fig. 3d

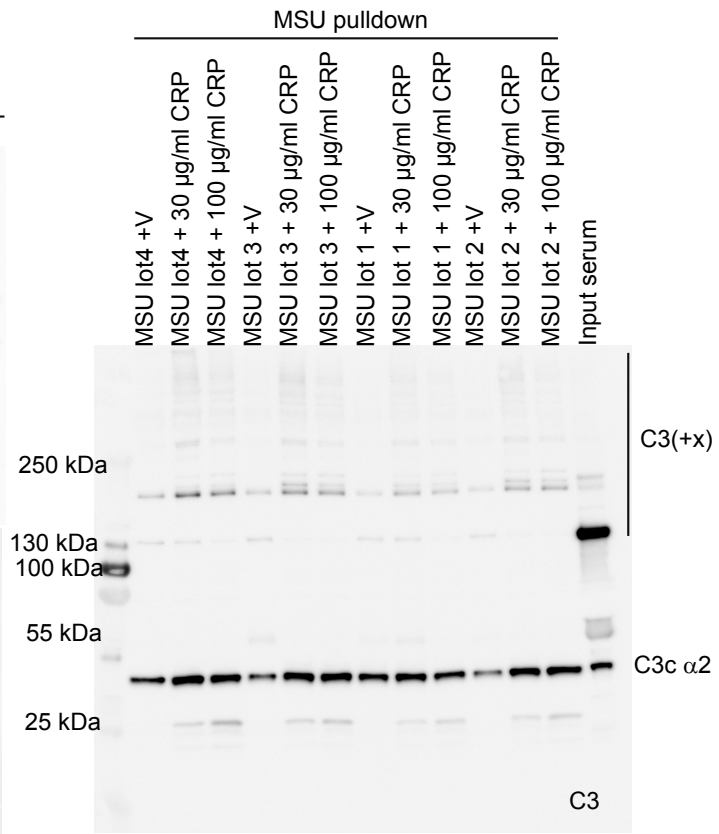

Figure S5. Uncropped gels and Western Blots from Figure 3c, d

Uncropped Western blots of Fig. S2a

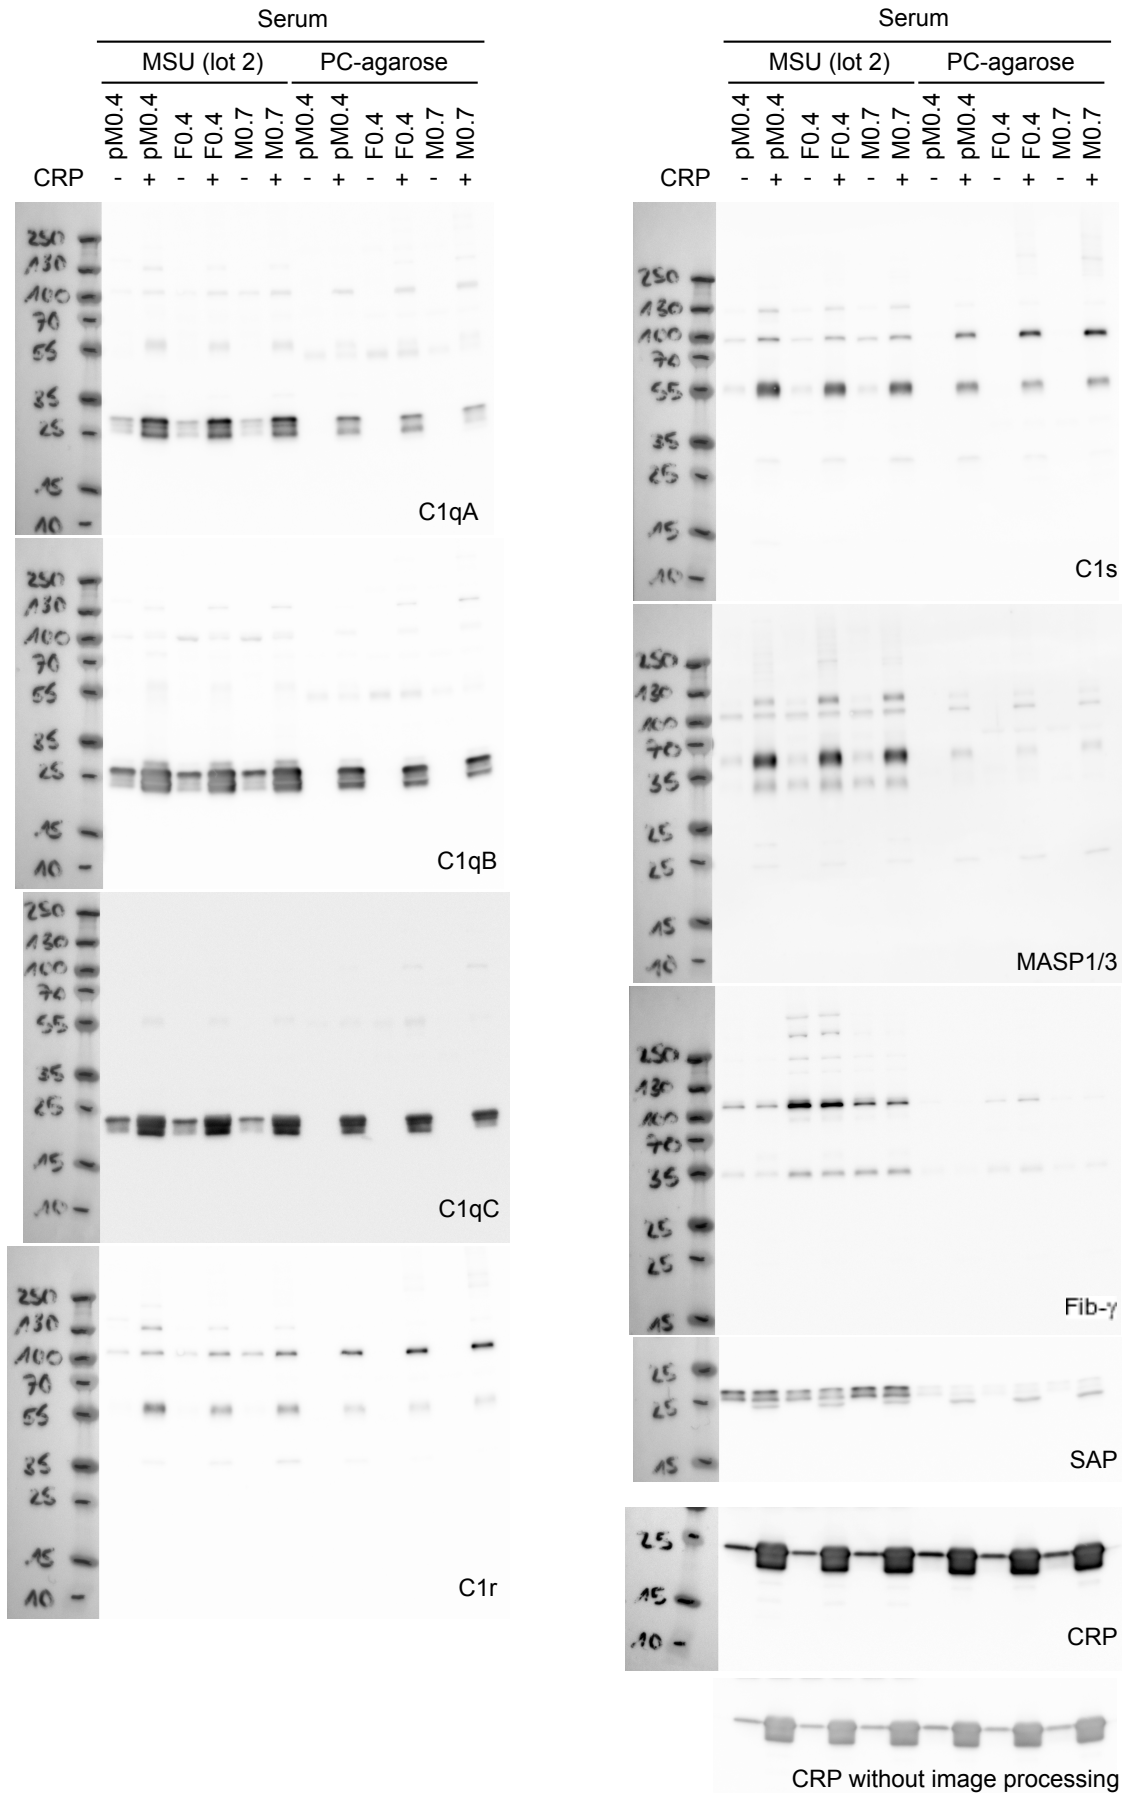

Figure S6. Uncropped gels and Western Blots from Figure S2a



Uncropped Western blots of Figure S2b

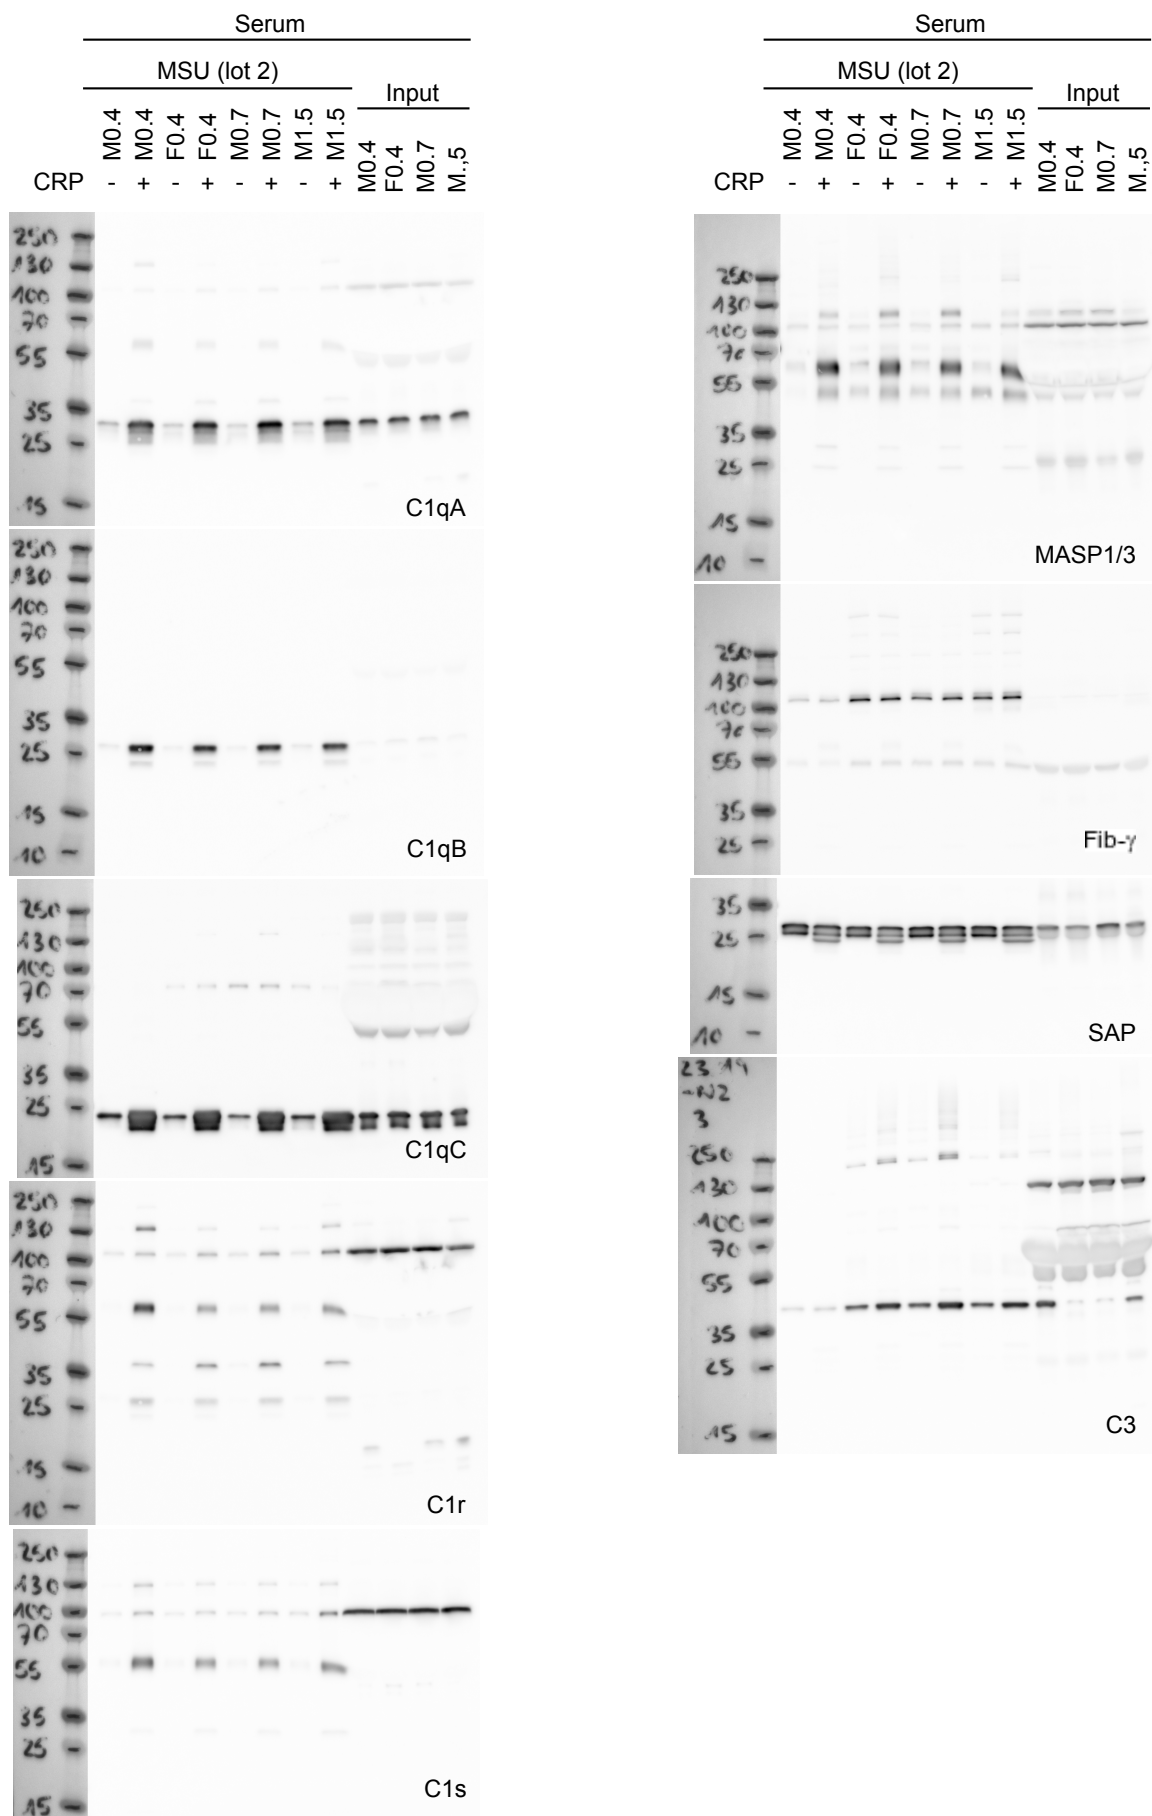

Figure S7. Uncropped gels and Western Blots from Figure S2b
